# Supplementary material for: Identifying transcription start sites and active enhancer elements using BruUV-seq
Source: PubMed Central journal article supplement (PMC4675984; doi:10.1038/srep17978), 2015-12-11
Supplement: srep17978-s1.pdf [file srep17978-s1.pdf]

## **Supplementary Material**

### **Identifying transcription start sites and active enhancer elements using BruUV-seq**

Brian Magnuson, Artur Veloso, Killeen S. Kirkconnell, Leonardo Carmo de Andrade Lima, Michelle T. Paulsen, Emily A. Ljungman, Karan Bedi, Jayendra Prasad, Thomas E. Wilson and Mats Ljungman

#### **Table of contents:**

Supplementary Figures 1-10

Supplementary Table 1

Supplementary Material

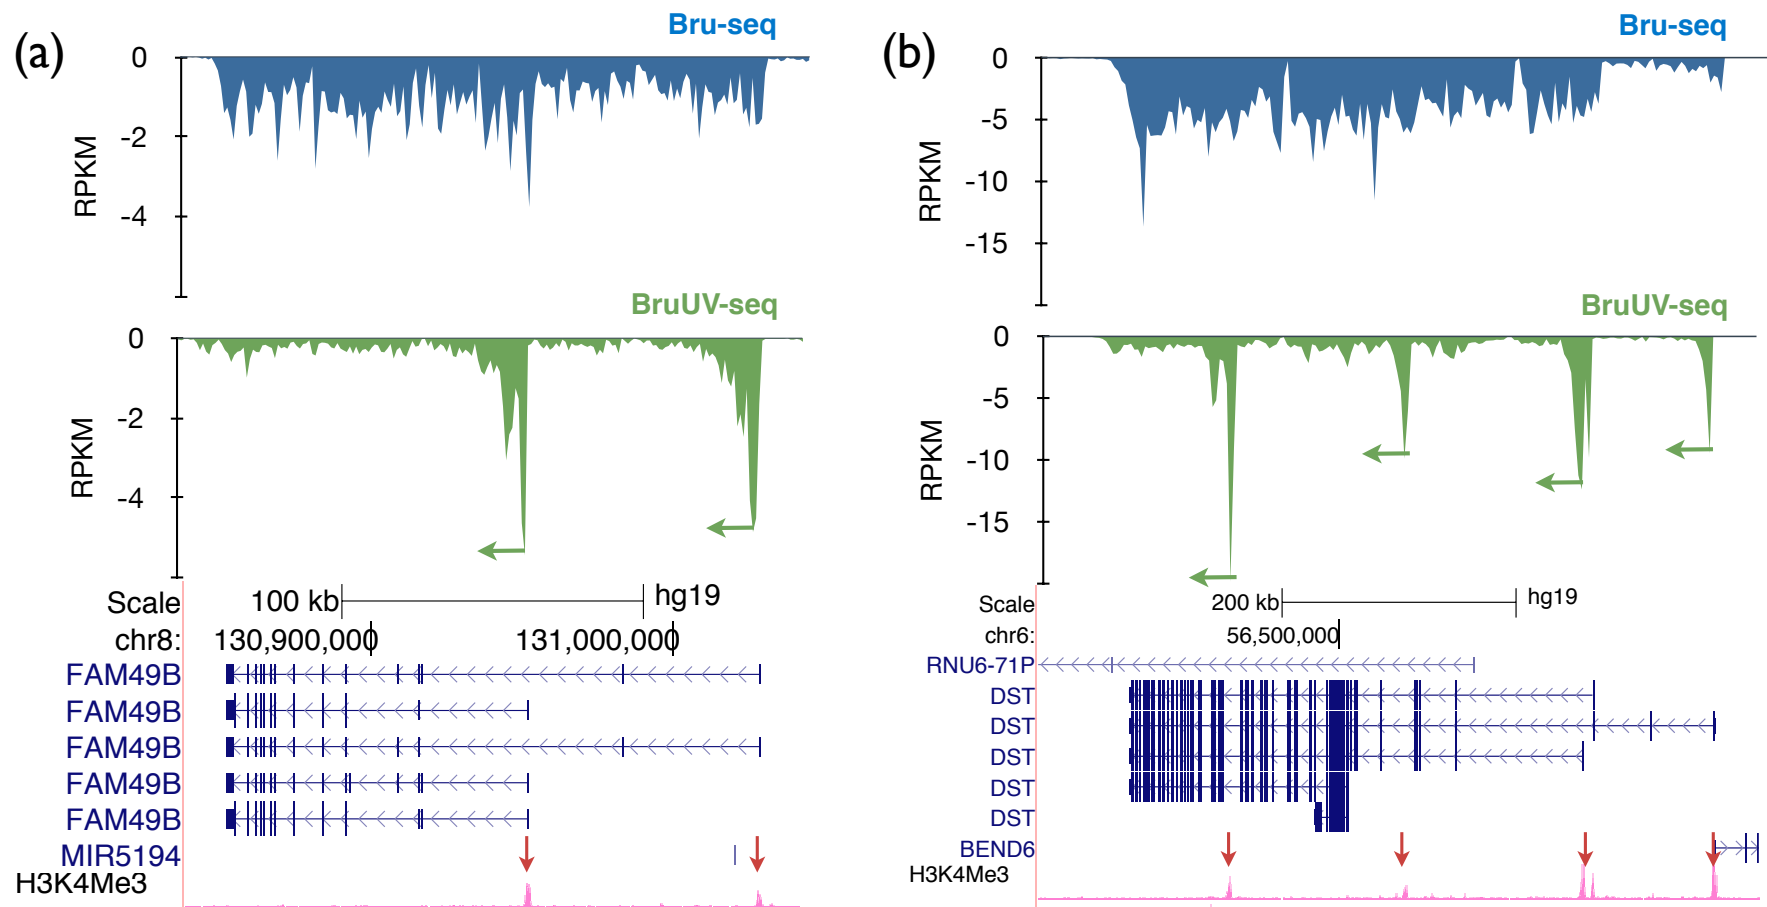

**Supplementary Figure 1.** BruUV-seq identifies multiple TSSs. Human fibroblasts HF1 were subjected to Bru-seq (top) or BruUV-seq (bottom). (a) The *FAM49B* gene is transcribed from two major TSSs which are lining up with the two major H3K4me3 peaks (red arrows). (b) The *DST* gene initiates transcription from 4 different TSSs that align with H3K4me3 peaks. The gene maps are from RfSeq and the H3K4me3 data from ENCODE (UCSC web browser).

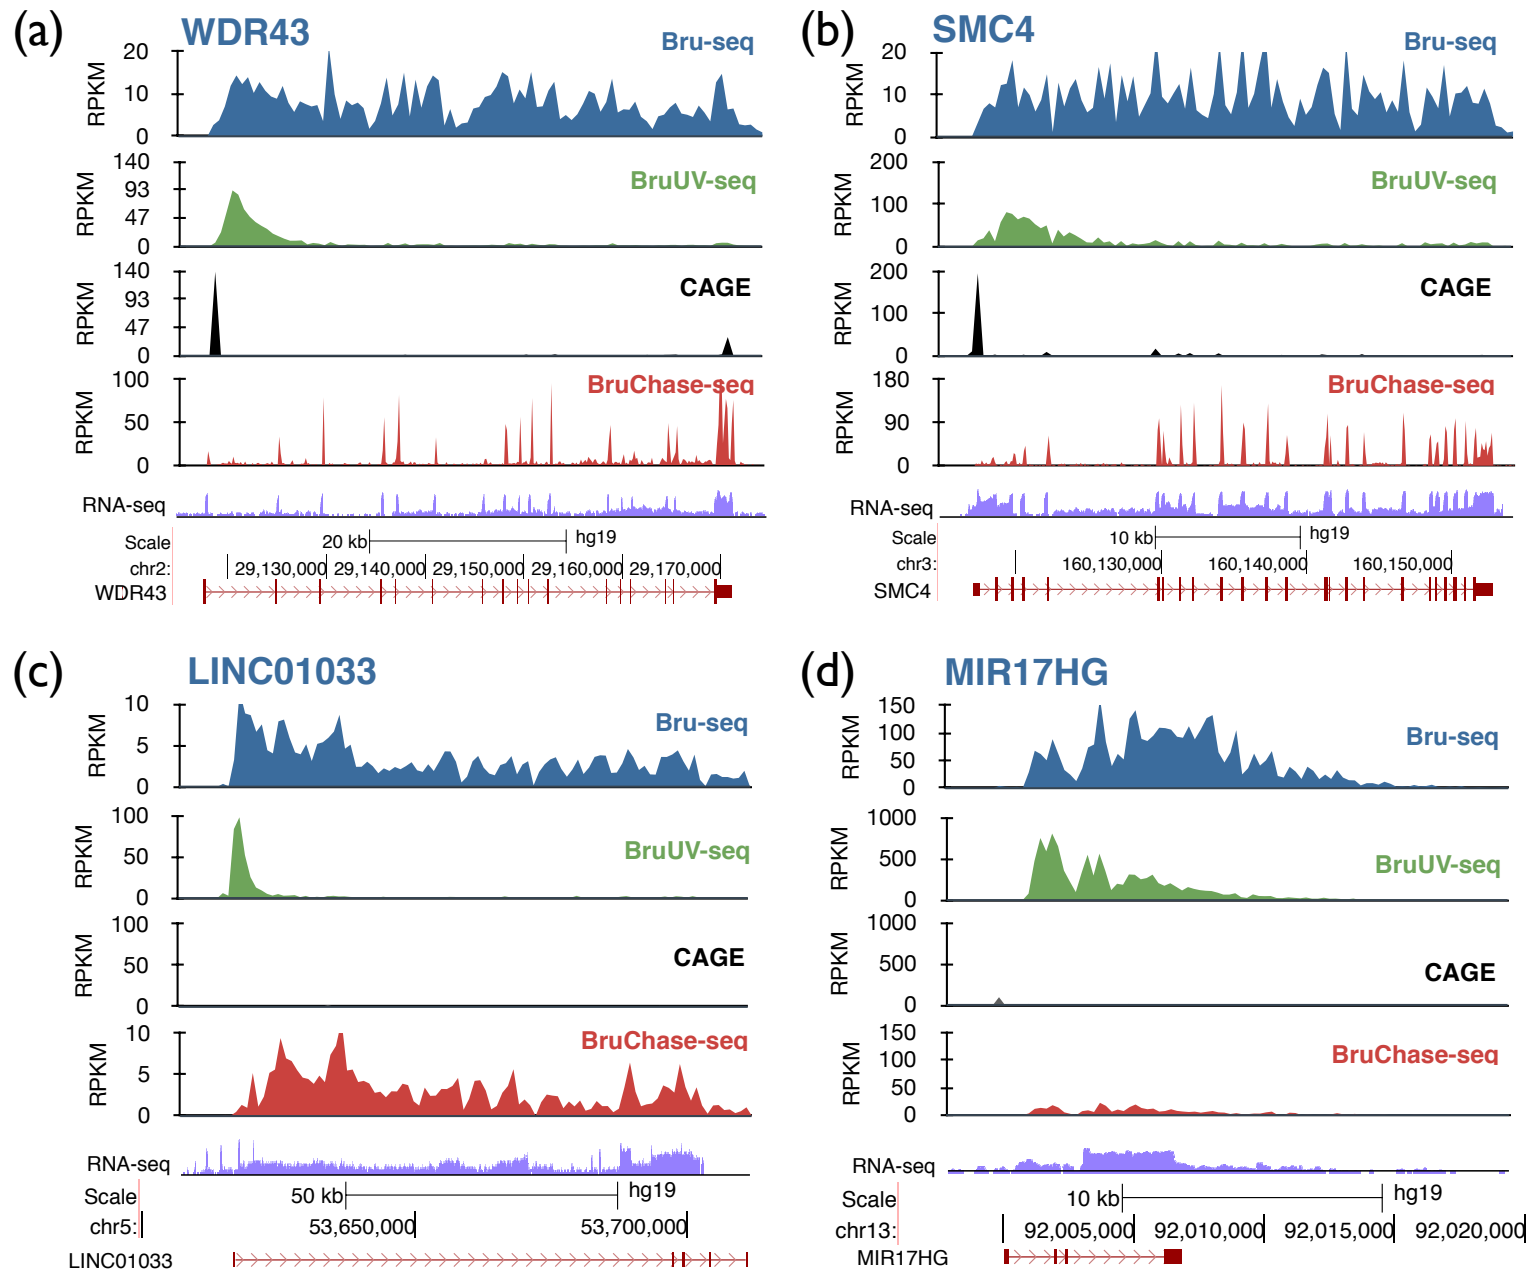

**Supplementary Figure 2.** Comparison of BruUV-seq and CAGE in K562 cells. (a) WDR43, (b) SMC4, (c) LINC01033 and (d) MIR17HG genes were analyzed and their signatures of Bru-seq (blue), BruUV-seq (green), CAGE (black) and BruChase-seq (red) are shown. The RNA-seq data is from ENCODE and the gene maps are from ENSEMBLE obtained from the UCSC web browser.

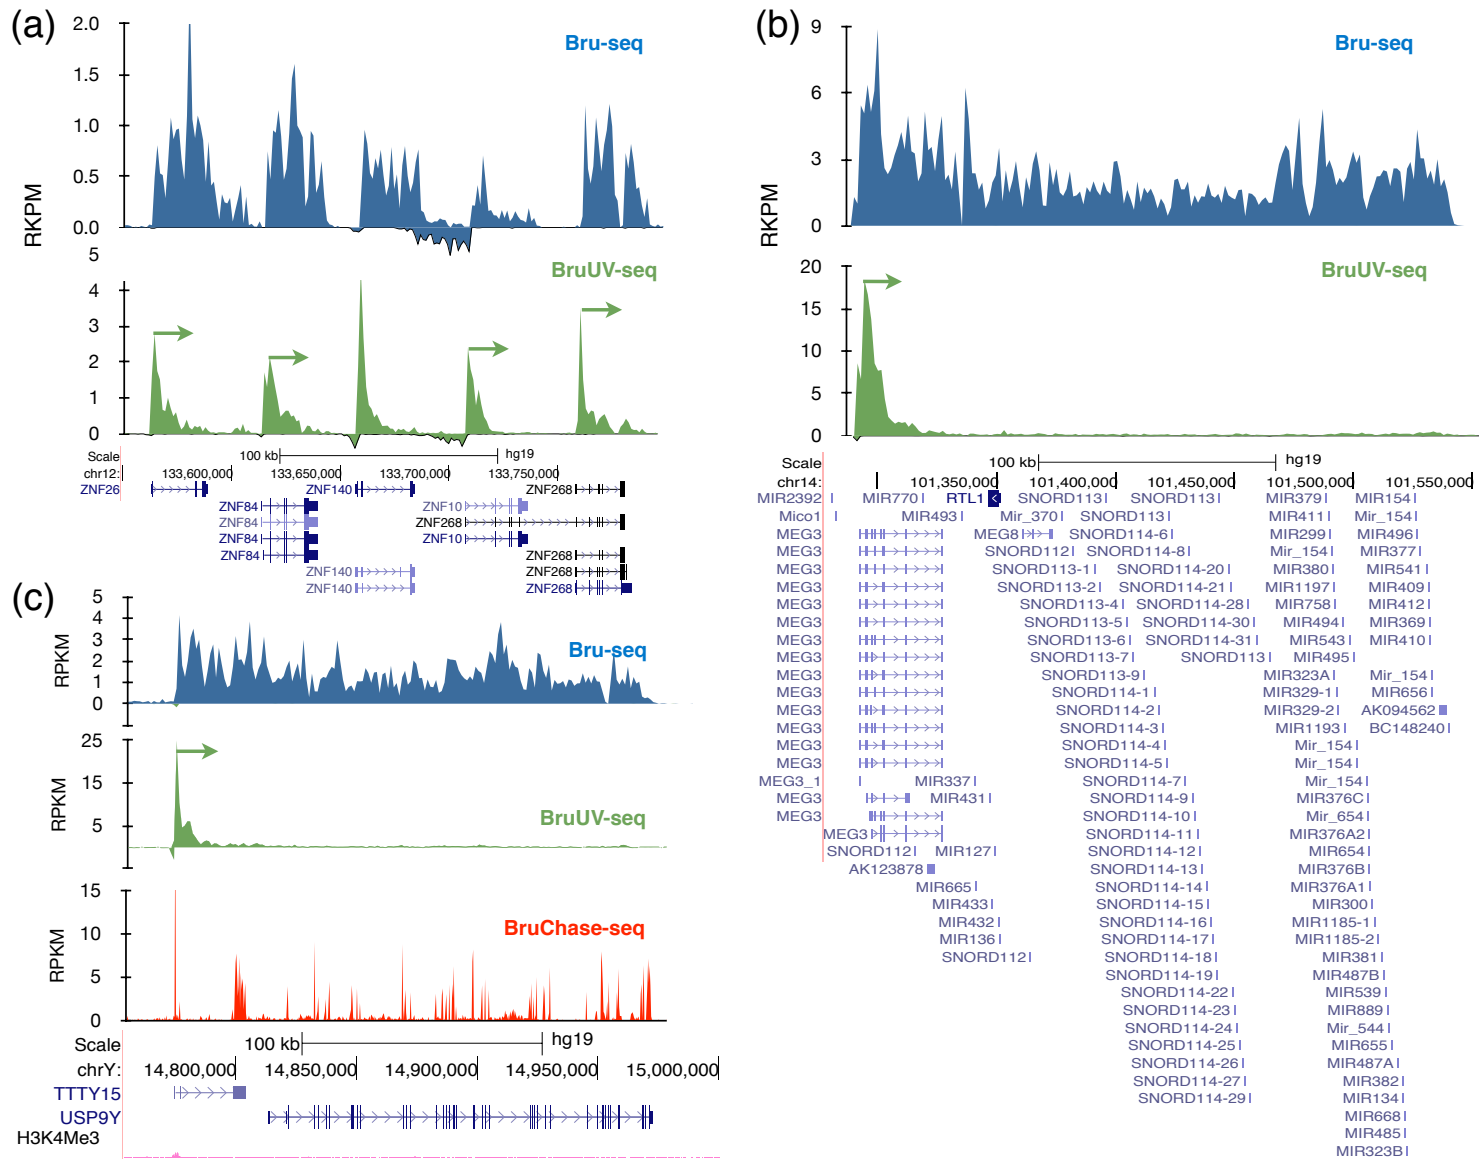

**Supplementary Figure 3.** BruUV-seq distinguishes between gene clusters initiating from individual or common promoters in HF1 cells. **(a)** Bru-seq (blue) and BruUV-seq (green) data of genes encoding the zinc-finger proteins *ZNF26*, *ZNF84*, *ZNF140*, *ZNF10* and *ZNF268* on chromosome 12 are shown. Each gene uses their individual TSS to direct their transcription. **(b)** Bru-seq and BruUV-seq data of a gene cluster on chromosome 14 transcribing as an operon from a common TSS. **(c)** Bru-seq, BruUV-seq and BruChase (6 h chase) data for the *TTY15* and *USP9Y* genes transcribing as an operon from a common TSS. Note that the primary transcript appears to be spliced. The gene maps are from RefSeq taken from the UCSC web browser.

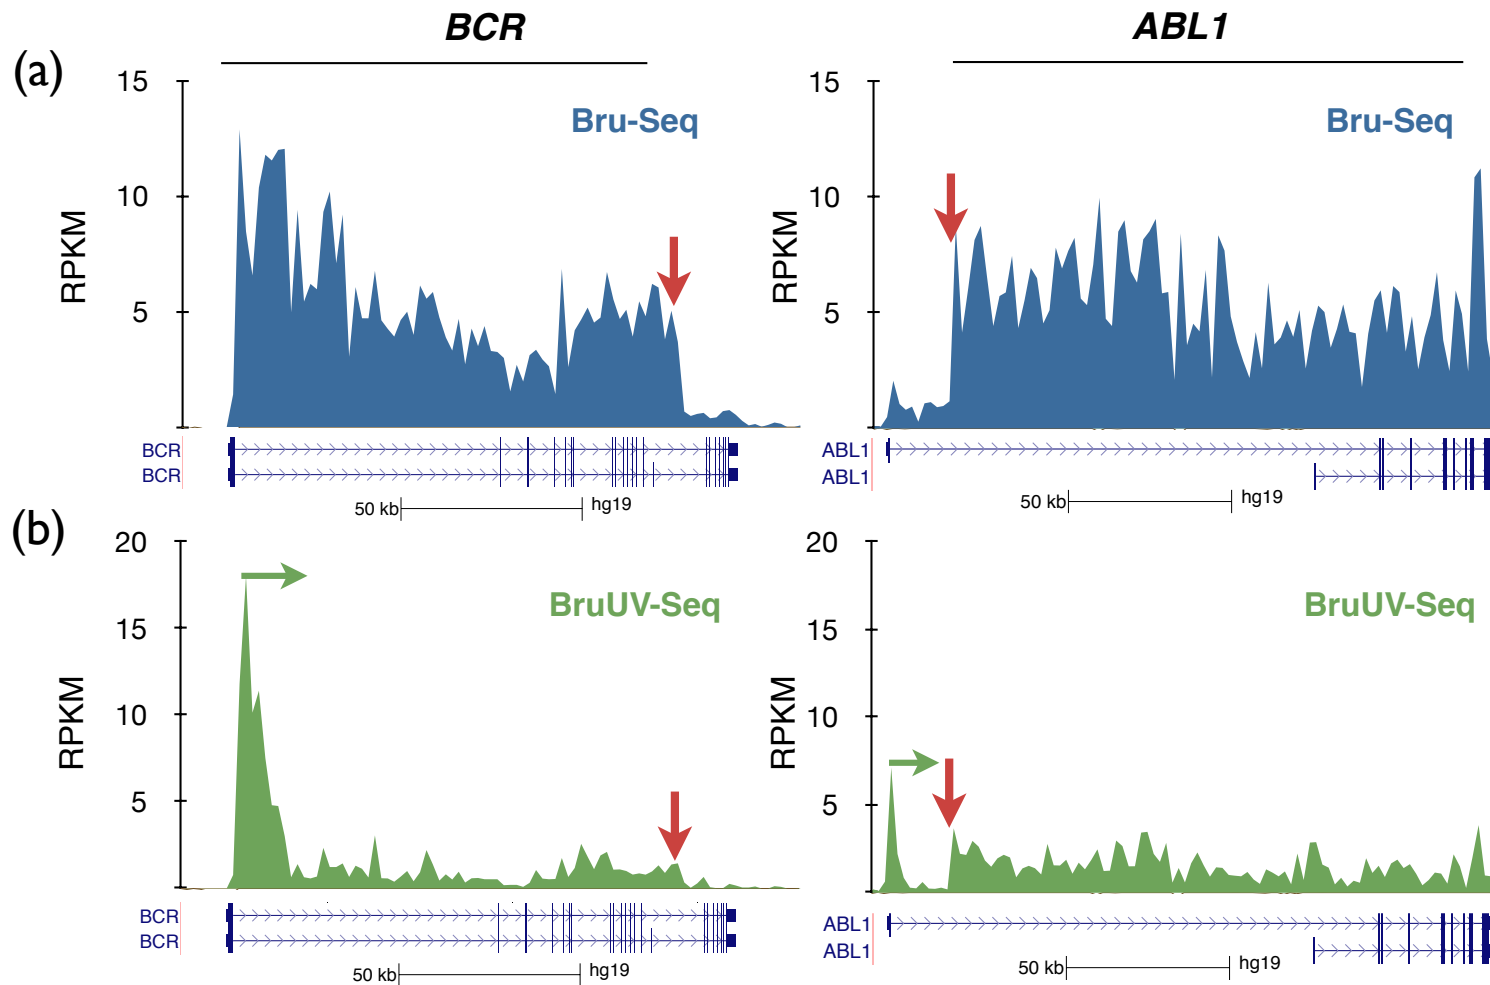

**Supplementary Figure 4.** BruUV-seq verifies the presence of the *BCR-ABL* fusion gene in K562 leukemia cells. (a) Nascent transcription (Bru-seq) is high in the *BCR* gene up to the breakpoint (arrow) where the transcription reads drop off. In contrast to the *BCR* gene, transcription from the *ABL1* gene (right) starts off with low counts until the breakpoint where the reads jump up. (b) Using BruUV-seq we observe the strong TSS in the *BCR* gene (left) and a small in the *ABL1* gene from the unaffected allele while no UV peak is observed at the breakpoint verifying that the increased downstream transcription must initiate elsewhere (at the TSS of the *BCR* gene).

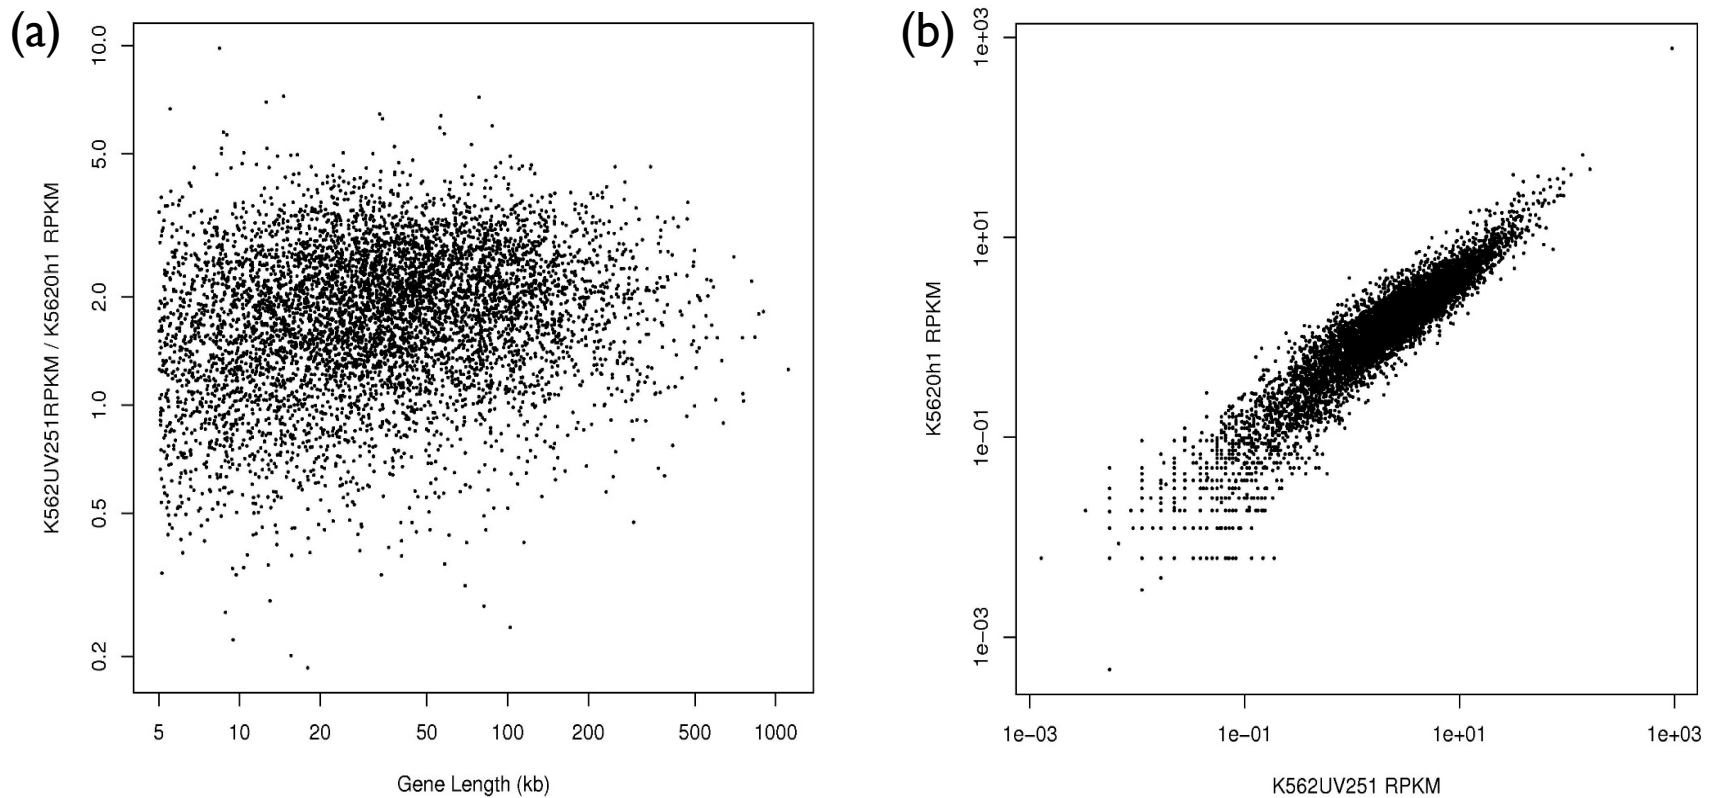

**Supplementary Figure 5.** UV-mediated inhibition does not affect the ratio between BruUV-seq and Bru-seq in the gene's first 5kb. (a) Absence of correlation between UV-mediated inhibition of transcription and genesize when measuring signal in the first 5kb of genes. The ratio of integrated transcription reads following UV-irradiation in HF1 human fibroblasts compared to mock-irradiated K562 cells are shown on the Y-axis while gene size is shown on the X-axis. (b) Positive correlation between gene expression (measured in the first 5kb of the gene) between UV-irradiated (X-axis) and mock-irradiated (Y-axis) K562 cells.

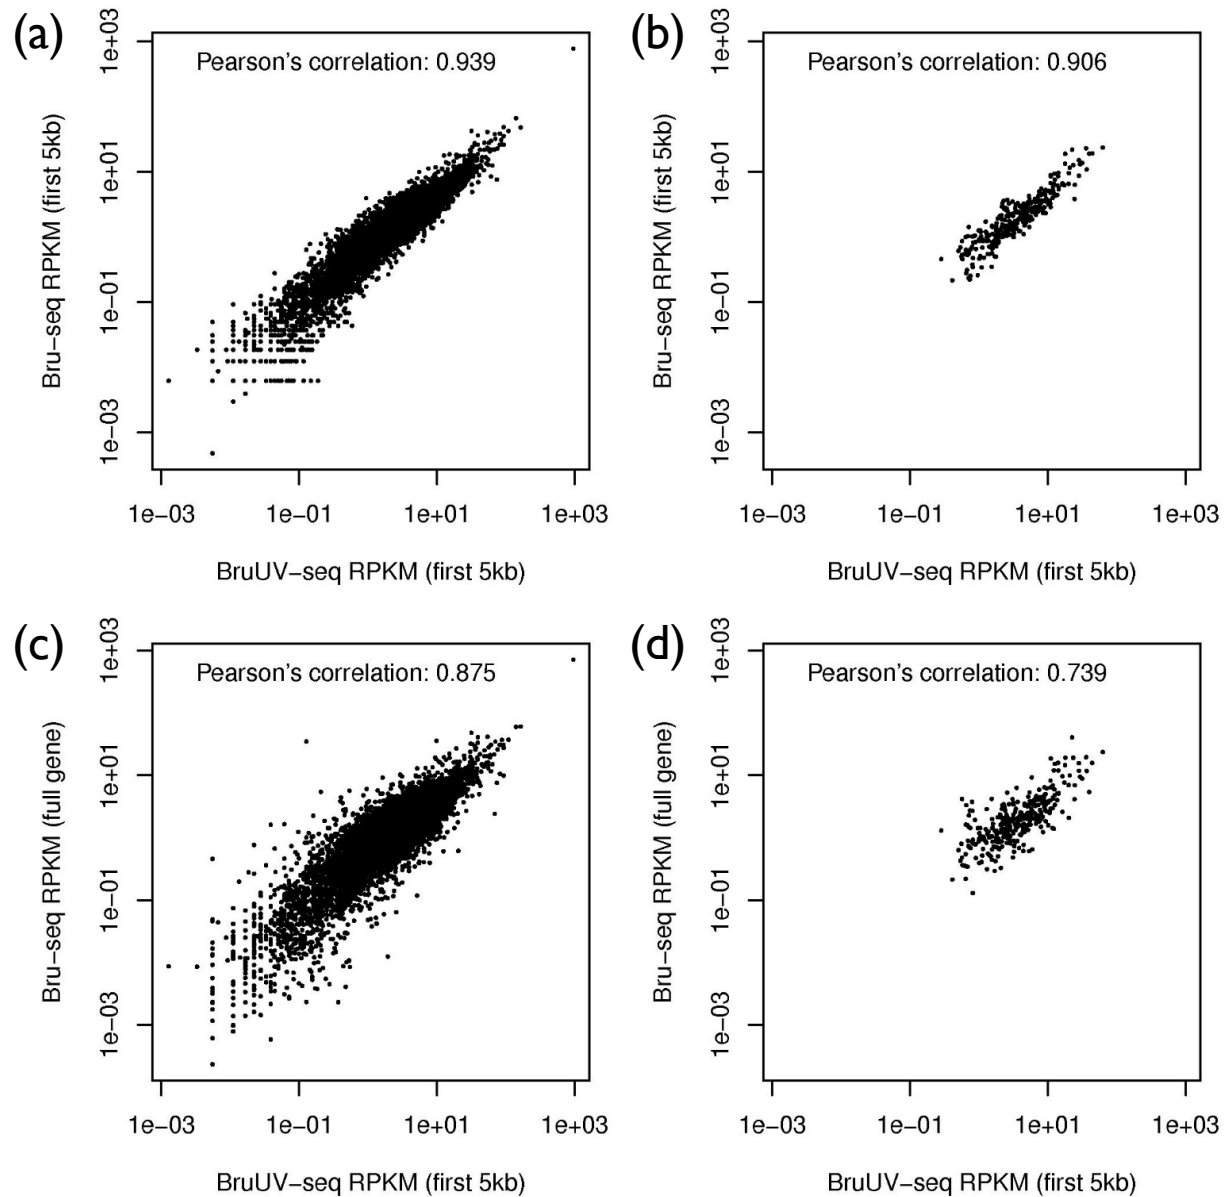

**Supplementary Figure 6.** Supp Fig 5. BruUV-seq expression signal in the first 5kb of genes is correlated to gene expression in mock-irradiated cells. Gene expression levels following UV-irradiation were measured in the first 5kb of genes and are displayed in the X-axis (a-d). Bru-seq calculated expression values measured based on the first 5kb (a,b) or whole gene (c,d) are displayed in the Y-axis. The panels have been split in order to differentiate between genes with one active TSS (a,c) and two or more active TSS (b,d).

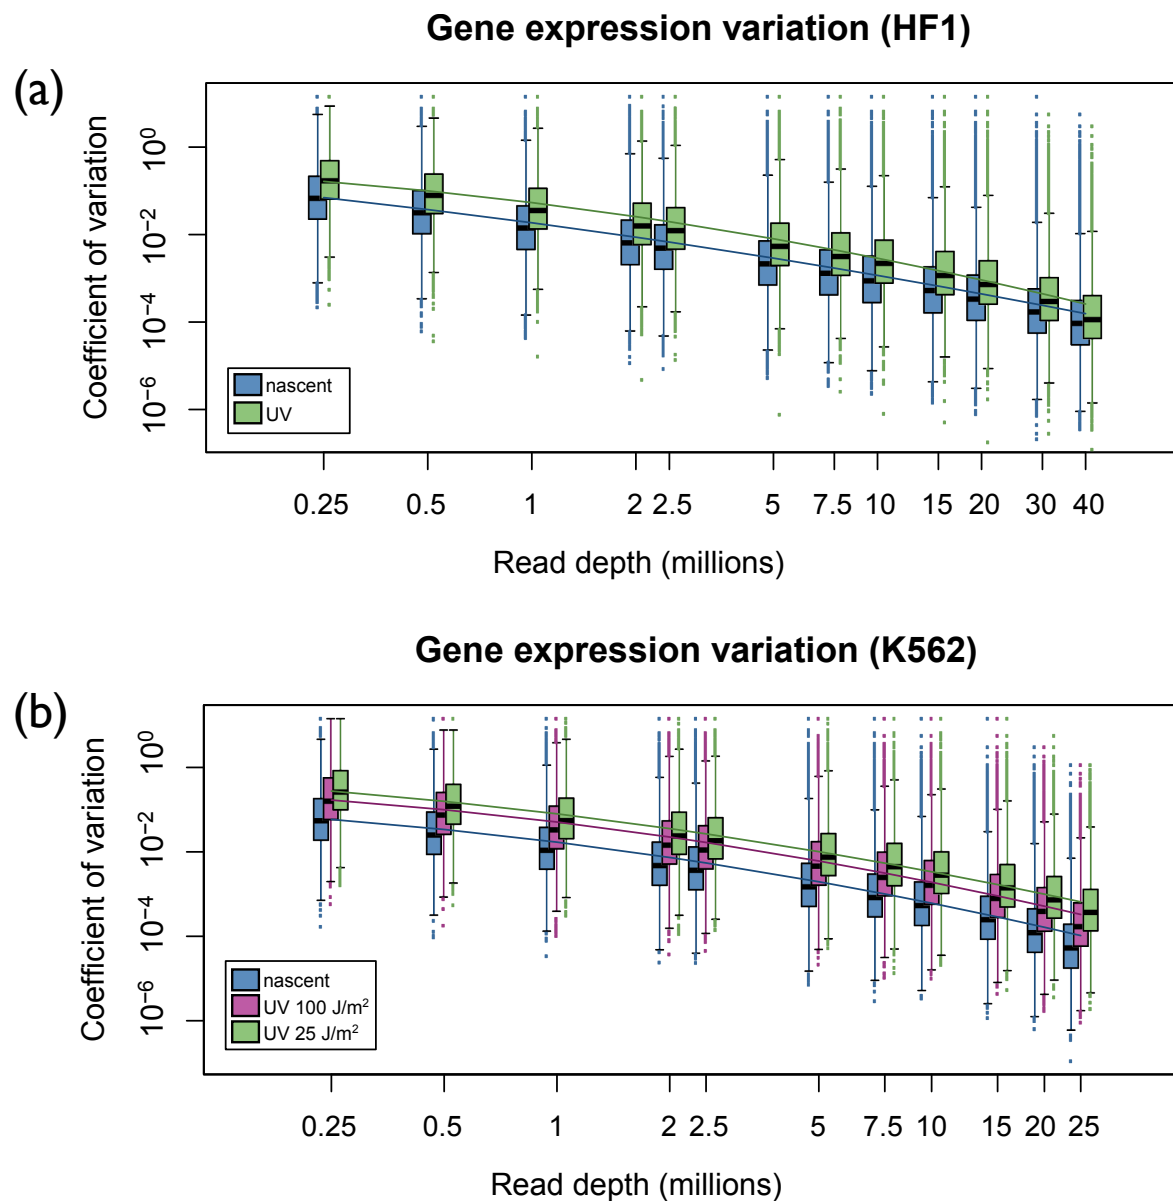

**Supplementary Figure 7.** Performance of BruUV-seq vs. Bru-seq in determining gene expression values at various read depths. (a) Variation of gene expression calculated from a BruUV-seq sample is higher, but similar to, values calculated from Bru-seq samples at various simulated read depths in HF1 cells. (b) In K562 cells, the similarity in coefficients of variation between Bru-seq- and BruUV-seq-derived data is dependent on UV dose. In both (a) and (b), gene expression (RPKM) was calculated at indicated read depths by randomly sampling experimental data 10 times each. Coefficients of variation (standard deviation divided by mean) were determined per gene from these 10 RPKM values. For BruUV-seq samples, only the first 5kb of genes was used to calculate RPKM.



chase 20 mM uridine

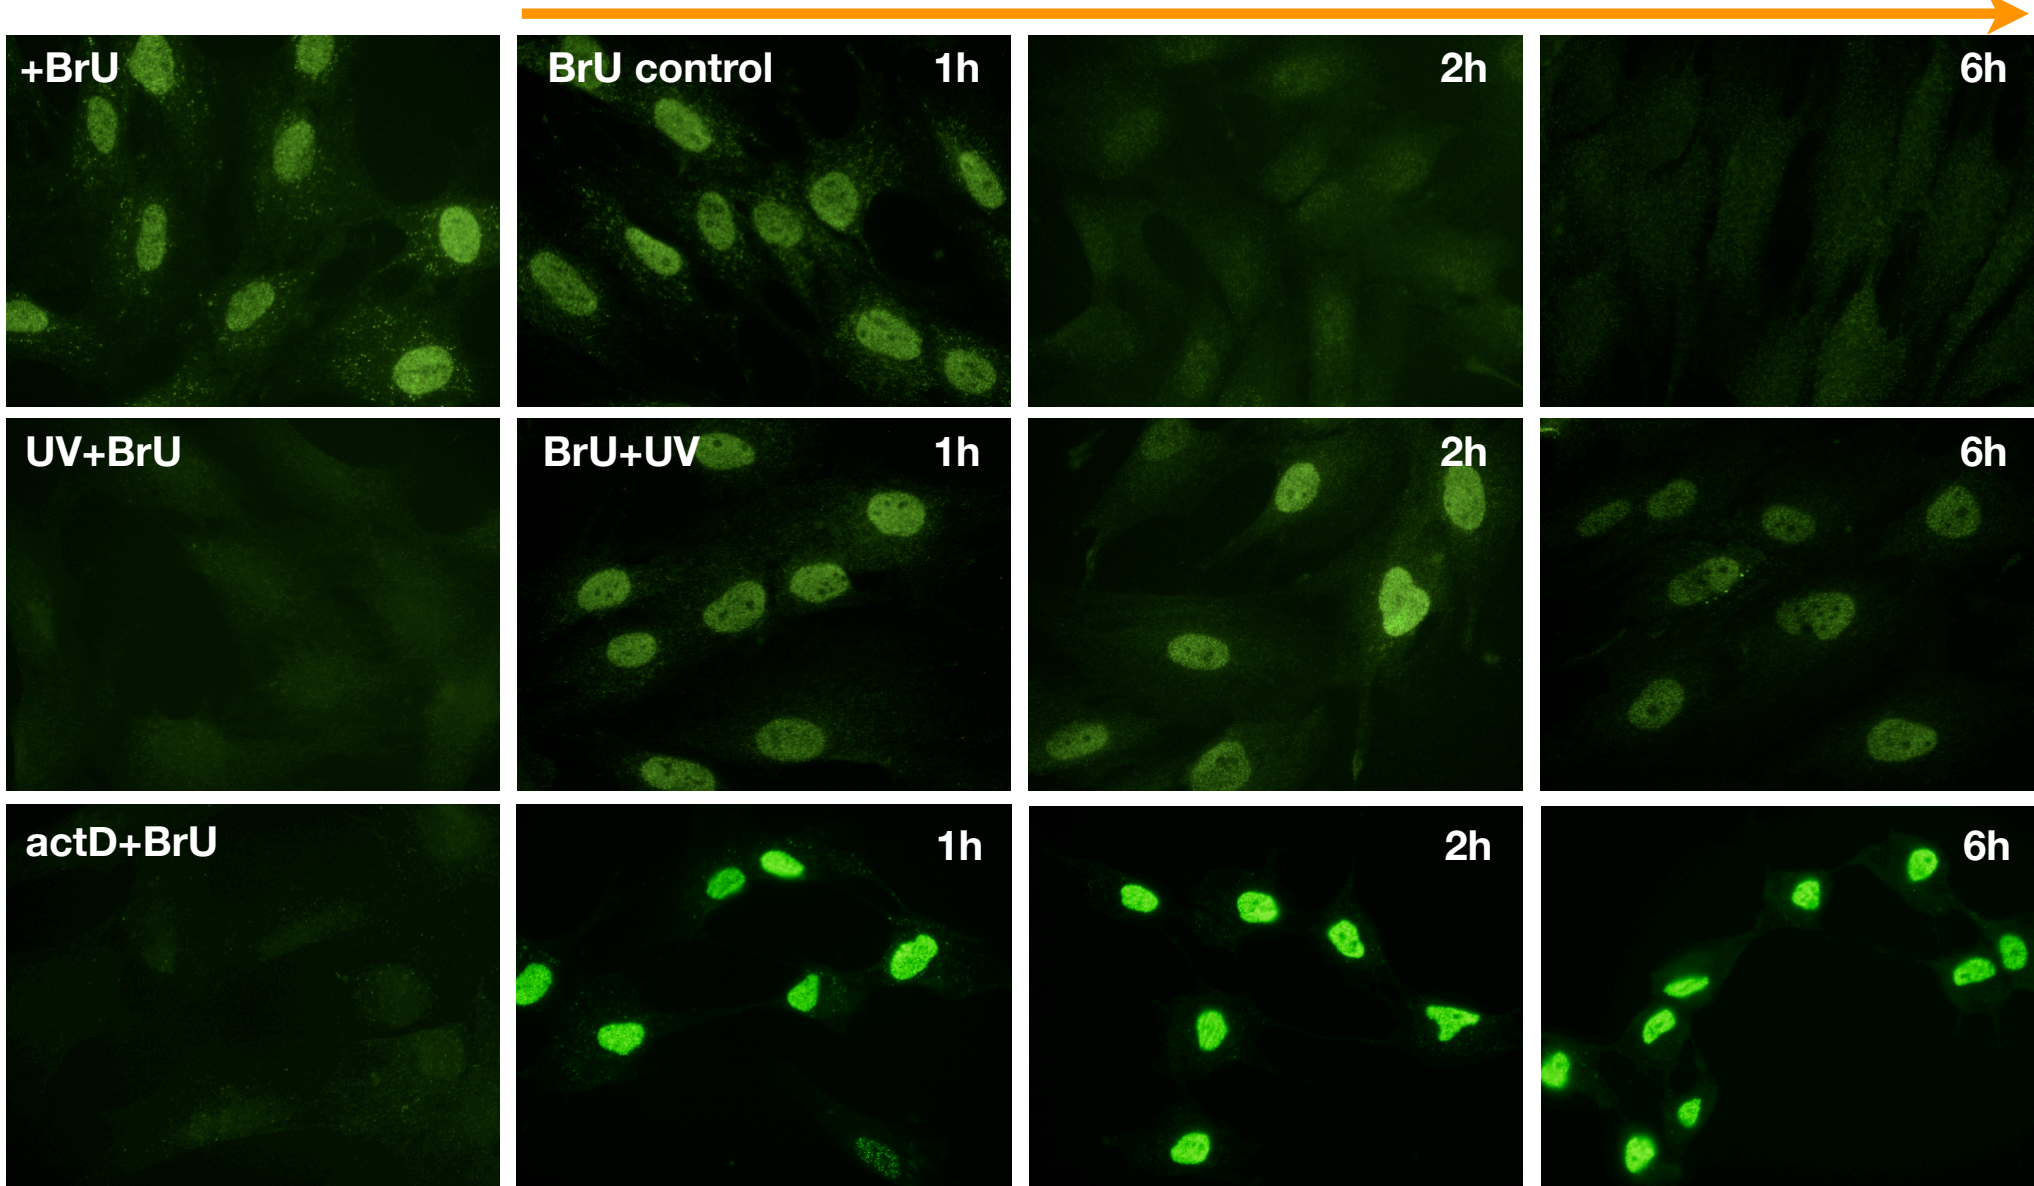

**Supplementary Figure 8.** Bromouridine staining in human fibroblasts HF1. Top row: Cells were labeled for 30 min with 2 mM Bru followed by chase in 20 mM uridine for different times. Middle row: Cells were irradiated with 50 J/m<sup>2</sup> directly prior (left) or following Bru-labeling, followed by uridine chase. Bottom row: Cells were treated with 10 µg/ml actinomycin D during Bru-labeling (left) or following labeling, during the chase in uridine.

Number of segments: 463

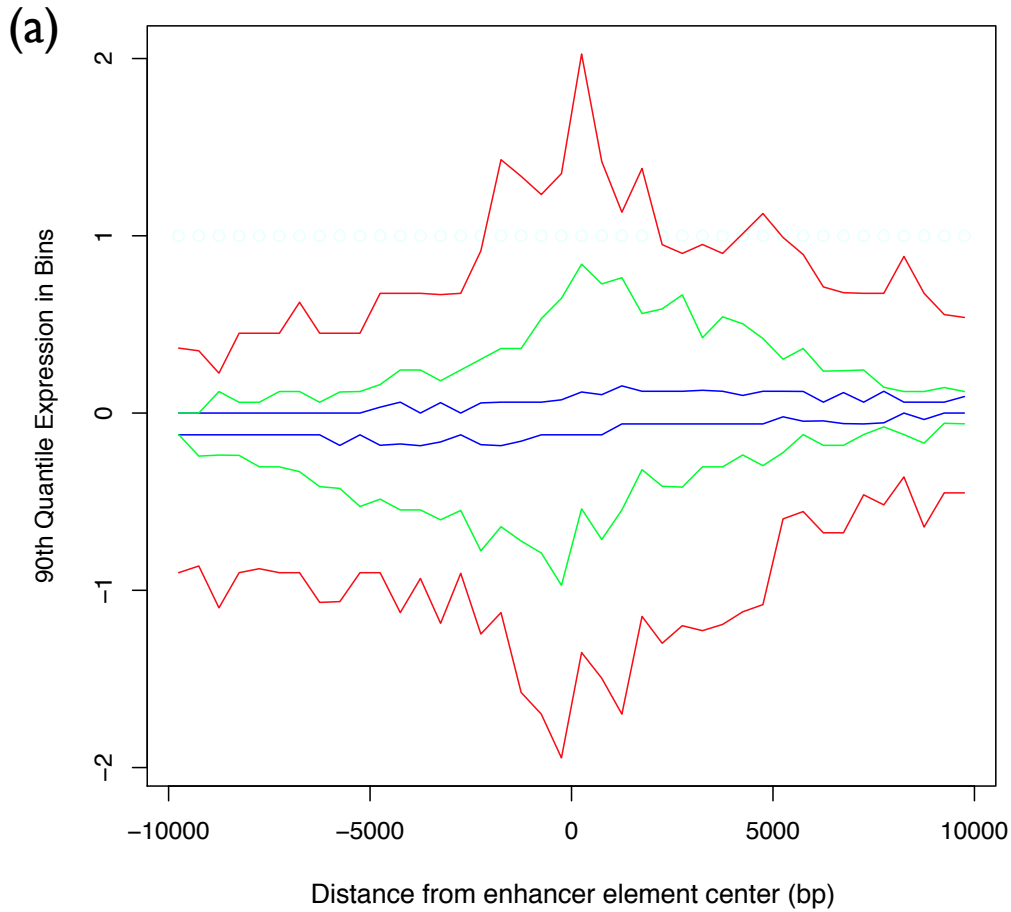

Number of genes: 2515

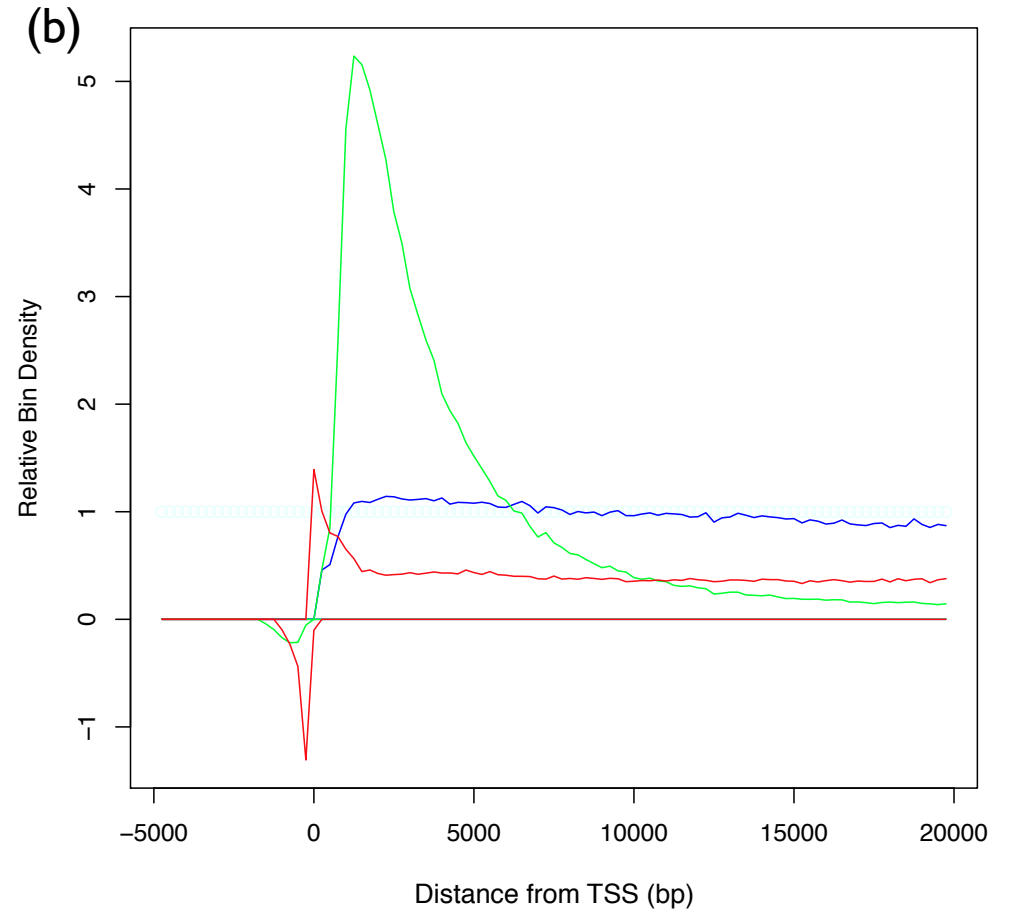

**Supplementary Figure 9.** Comparison of nascent RNA signal from K562 cells between Bru-seq (blue), BruUV-seq (100 J/m<sup>2</sup>; green), and GRO-seq (red) in (a) ENCODE-classified intergenic enhancers and (b) TSS of expressed RefSeq genes. In (a), enhancers were selected if nascent RNA segments were identified in both BruUV-seq and GRO-seq (463 segments). Genes represented in (b) were at least 20 kb long and expressed in the Bru-seq sample (2515 genes).

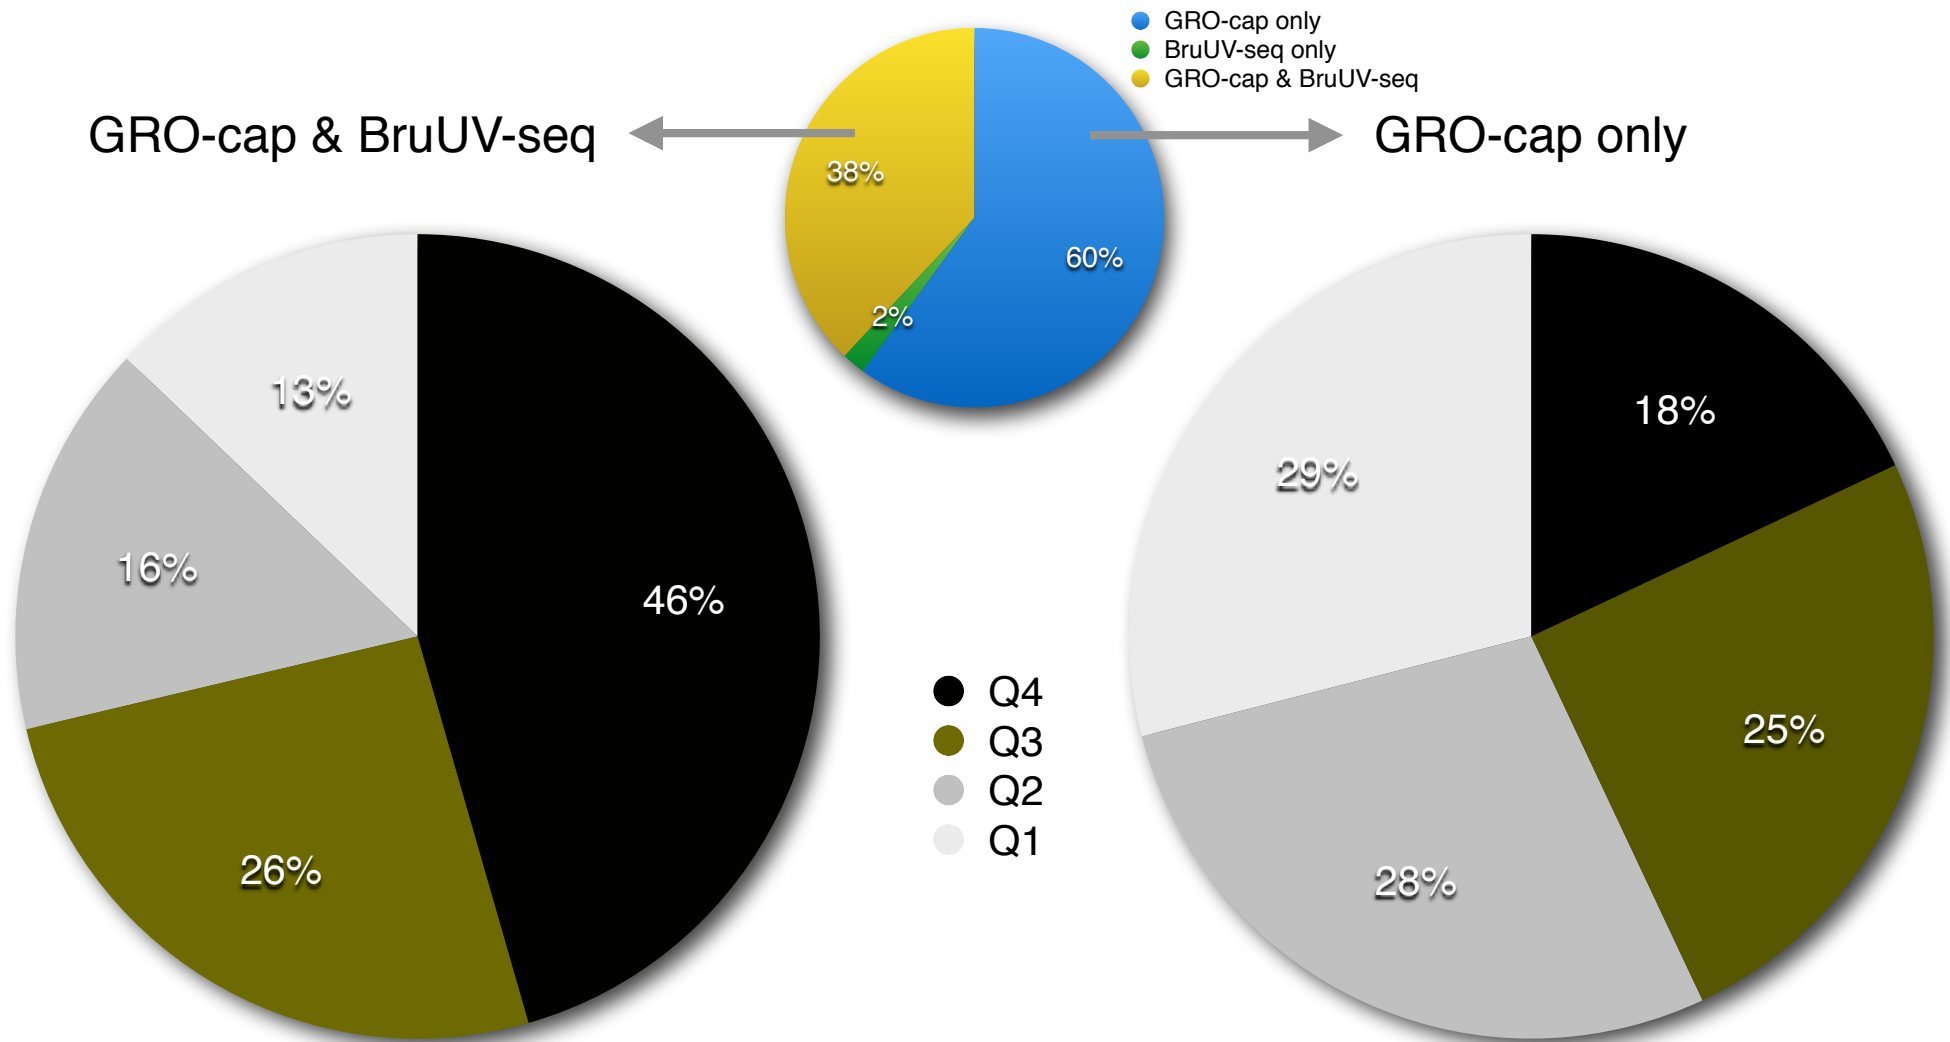

**Supplementary Figure 10.** Comparison of GRO-cap signal in ENCODE enhancer elements from Fig 4f (small pie chart, top) where signal was found for both GRO-cap and BruUV-seq (left) and for signal detected only by GRO-cap (right). The GRO-cap signal is divided into four intensity quartiles where Q1 is the lowest (light shade) and Q4 is the highest intensity (dark shade). It can be seen that enhancer identified by BruUV-seq correspond to more GRO-cap signals with high intensity (dark shade) compared with enhancer elements identified by GRO-cap alone.

| chrom | start     | end       | name         | strand | bp     | meanRPKM | meanCount | TNF    | control | foldChange | BruUV peaks |
|-------|-----------|-----------|--------------|--------|--------|----------|-----------|--------|---------|------------|-------------|
| chr4  | 74606222  | 74609433  | IL8          | +      | 3211   | 81.857   | 12111     | 24147  | 75      | 320.439    | >10         |
| chr4  | 74735108  | 74736955  | CXCL1        | +      | 1847   | 37.148   | 3161      | 6302   | 20      | 306.648    | 1           |
| chr4  | 74902311  | 74904490  | CXCL3        | -      | 2179   | 9.596    | 963       | 1918   | 7       | 248.939    | 1           |
| chr6  | 31543349  | 31546112  | TNF          | +      | 2763   | 3.138    | 399       | 795    | 3       | 232.159    | >10         |
| chr4  | 74962753  | 74964997  | CXCL2        | -      | 2244   | 21.388   | 2209      | 4394   | 24      | 176.944    | >5          |
| chr19 | 10381516  | 10397291  | ICAM1        | +      | 15775  | 4.284    | 3110      | 6182   | 38      | 160.424    | 0           |
| chr2  | 113587336 | 113594356 | IL1B         | -      | 7020   | 16.369   | 5285      | 10486  | 84      | 123.691    | >5          |
| chr6  | 160100148 | 160114353 | SOD2         | -      | 14205  | 35.869   | 23427     | 46428  | 426     | 108.869    | 2           |
| chr17 | 77020250  | 77045870  | C1QTNF1      | +      | 25620  | 2.163    | 2546      | 5040   | 53      | 94.927     | 4           |
| chr2  | 113531491 | 113542971 | IL1A         | -      | 11480  | 7.951    | 4193      | 8288   | 97      | 84.904     | >5          |
| chr17 | 32582295  | 32584220  | CCL2         | +      | 1925   | 13.216   | 1168      | 2306   | 29      | 76.948     | >10         |
| chr9  | 123664670 | 123691451 | TRAF1        | -      | 26781  | 2.122    | 2606      | 5125   | 87      | 58.676     | 5           |
| chr3  | 157154579 | 157161417 | PTX3         | +      | 6838   | 58.669   | 18394     | 36166  | 621     | 58.172     | 0           |
| chr8  | 125563027 | 125740730 | MTSS1        | -      | 177703 | 2.487    | 20230     | 39583  | 876     | 45.14      | >5          |
| chr8  | 72753776  | 72756731  | MSC          | -      | 2955   | 0.861    | 116       | 226    | 5       | 37.792     | 2           |
| chr7  | 22766765  | 22771621  | IL6          | +      | 4856   | 6.219    | 1380      | 2688   | 71      | 37.37      | 5           |
| chr15 | 45722762  | 45725647  | C15orf48     | +      | 2885   | 0.741    | 97        | 190    | 5       | 37.045     | 2           |
| chr17 | 9548949   | 9633003   | USP43        | +      | 84054  | 0.744    | 2857      | 5554   | 160     | 34.689     | 0           |
| chr6  | 14117486  | 14137148  | CD83         | +      | 19662  | 0.776    | 696       | 1353   | 40      | 33.627     | 0           |
| chr19 | 45504706  | 45541456  | RELB         | +      | 36750  | 1.462    | 2452      | 4758   | 146     | 32.496     | 0           |
| chr6  | 138188580 | 138204449 | TNFAIP3      | +      | 15869  | 8.871    | 6418      | 12420  | 416     | 29.843     | >5          |
| chr21 | 34602230  | 34636820  | IFNAR2       | +      | 34590  | 6.351    | 10009     | 19326  | 691     | 27.931     | 2           |
| chr5  | 131817300 | 131826465 | IRF1         | -      | 9165   | 6.024    | 2513      | 4844   | 182     | 26.562     | 2           |
| chr14 | 103592663 | 103603776 | TNFAIP2      | +      | 11113  | 3.787    | 1915      | 3691   | 140     | 26.283     | 0           |
| chr3  | 189674516 | 189840226 | LEPREL1      | -      | 165710 | 10.692   | 80586     | 154837 | 6335    | 24.441     | >5          |
| chr3  | 10206562  | 10285427  | IRAK2        | +      | 78865  | 2.81     | 10076     | 19346  | 807     | 23.957     | 5           |
| chr5  | 118604417 | 118730294 | TNFAIP8      | +      | 125877 | 2.708    | 15478     | 29604  | 1353    | 21.88      | 4           |
| chr21 | 26934456  | 26947480  | MIR155HG     | +      | 13024  | 33.869   | 20018     | 38220  | 1817    | 21.033     | 1           |
| chr15 | 71184927  | 71342436  | LRRRC49      | +      | 157509 | 2.14     | 15272     | 29017  | 1526    | 19.004     | 0           |
| chr7  | 134127106 | 134143888 | AKR1B1       | -      | 16782  | 3.72     | 2825      | 5352   | 298     | 17.962     | 0           |
| chr10 | 75670861  | 75677258  | PLAU         | +      | 6397   | 1.3      | 376       | 711    | 41      | 17.301     | >5          |
| chr4  | 113196781 | 113207059 | TIFA         | -      | 10278  | 2.932    | 1362      | 2574   | 150     | 17.084     | 0           |
| chr11 | 10471867  | 10529126  | AMPD3        | +      | 57259  | 2.504    | 6477      | 12206  | 749     | 16.29      | 5           |
| chr1  | 205271190 | 205290883 | NUAK2        | -      | 19693  | 7.306    | 6500      | 12246  | 754     | 16.232     | 5           |
| chr1  | 89573309  | 89591799  | GBP2         | -      | 18490  | 1.494    | 1247      | 2343   | 150     | 15.55      | 0           |
| chr8  | 22224761  | 22291640  | SLC39A14     | +      | 66879  | 4.081    | 12310     | 23084  | 1536    | 15.026     | 2           |
| chr1  | 110453232 | 110473616 | CSF1         | +      | 20384  | 5.656    | 5200      | 9749   | 650     | 14.98      | 1           |
| chr2  | 111878490 | 111926022 | BCL2L11      | +      | 47532  | 0.821    | 1757      | 3280   | 234     | 13.98      | 0           |
| chr12 | 10310898  | 10324790  | OLR1         | -      | 13892  | 1.904    | 1191      | 2222   | 160     | 13.877     | >10         |
| chr14 | 96722546  | 96731100  | BDKRB1       | +      | 8554   | 16.129   | 6210      | 11571  | 849     | 13.621     | 3           |
| chr7  | 41728600  | 41742706  | INHBA        | -      | 14106  | 18.433   | 11694     | 21738  | 1651    | 13.167     | 2           |
| chr6  | 143072603 | 143266338 | HIVEP2       | -      | 193735 | 8.578    | 74672     | 138405 | 10939   | 12.652     | >5          |
| chr22 | 18216905  | 18257431  | BID          | -      | 40526  | 0.75     | 1366      | 2531   | 201     | 12.58      | 0           |
| chr14 | 35870715  | 35873960  | NFKBIA       | -      | 3245   | 25.251   | 3677      | 6793   | 561     | 12.094     | 0           |
| chr12 | 50031723  | 50101197  | FMNL3        | -      | 69474  | 2.701    | 8421      | 15545  | 1297    | 11.982     | 1           |
| chr6  | 126102306 | 126253176 | NCOA7        | +      | 150870 | 2.918    | 19748     | 36424  | 3072    | 11.855     | 5           |
| chr8  | 23536205  | 23540450  | NKX3-1       | -      | 4245   | 1.333    | 253       | 464    | 41      | 11.076     | 0           |
| chr12 | 105197274 | 105322472 | SLC41A2      | -      | 125198 | 0.94     | 5270      | 9658   | 882     | 10.95      | 1           |
| chr21 | 34775201  | 34809828  | IFNGR2       | +      | 34627  | 4.449    | 6894      | 12623  | 1165    | 10.831     | 3           |
| chr10 | 104154228 | 104162281 | NFKB2        | +      | 8053   | 0.616    | 222       | 406    | 37      | 10.785     | 0           |
| chr8  | 124510126 | 124553493 | FBXO32       | -      | 43367  | 3.094    | 6005      | 10988  | 1021    | 10.756     | 1           |
| chr5  | 150409503 | 150467221 | TNIP1        | -      | 57718  | 4.624    | 11926     | 21732  | 2119    | 10.254     | 1           |
| chr6  | 12290528  | 12297427  | EDN1         | +      | 6899   | 3.858    | 1189      | 2165   | 213     | 10.153     | 4           |
| chr4  | 103422485 | 103538459 | NFKB1        | +      | 115974 | 9.379    | 48565     | 88266  | 8864    | 9.957      | 2           |
| chr8  | 23386362  | 23430063  | SLC25A37     | +      | 43701  | 3.248    | 6336      | 11513  | 1159    | 9.93       | 1           |
| chr8  | 72755357  | 72968547  | LOC100132891 | +      | 213190 | 0.747    | 7108      | 12896  | 1321    | 9.76       | 1           |
| chr11 | 102706527 | 102714342 | MMP3         | -      | 7815   | 3.007    | 1048      | 1902   | 195     | 9.743      | 5           |

|       |           |           |           |   |        |        |        |        |       |       |     |
|-------|-----------|-----------|-----------|---|--------|--------|--------|--------|-------|-------|-----|
| chr2  | 224839764 | 224904036 | SERPINE2  | - | 64272  | 2.192  | 6269   | 11266  | 1271  | 8.86  | 0   |
| chr2  | 68694690  | 68807294  | APLF      | + | 112604 | 0.587  | 2939   | 5281   | 597   | 8.836 | 0   |
| chr6  | 44225902  | 44233525  | NFKBIE    | - | 7623   | 0.855  | 289    | 519    | 59    | 8.669 | 0   |
| chr1  | 218518675 | 218617961 | TGFB2     | + | 99286  | 2.086  | 9206   | 16508  | 1905  | 8.664 | 4   |
| chr11 | 34172533  | 34379555  | ABTB2     | - | 207022 | 0.722  | 6639   | 11892  | 1386  | 8.578 | 0   |
| chr12 | 91497231  | 91505542  | LUM       | - | 8311   | 9.727  | 3590   | 6419   | 762   | 8.422 | >10 |
| chr12 | 102271104 | 102317401 | DRAM1     | + | 46297  | 14.08  | 28940  | 51655  | 6225  | 8.297 | 3   |
| chr4  | 38665789  | 38703129  | KLF3      | + | 37340  | 13.769 | 22814  | 40659  | 4969  | 8.182 | 1   |
| chr2  | 206547223 | 206662857 | NRP2      | + | 115634 | 4.397  | 22556  | 40169  | 4942  | 8.127 | 3   |
| chr6  | 32812985  | 32821748  | TAP1      | - | 8763   | 0.923  | 358    | 638    | 78    | 8.108 | 0   |
| chr14 | 71374121  | 71582099  | PCNX      | + | 207978 | 7.527  | 69435  | 123589 | 15281 | 8.088 | 3   |
| chr9  | 71736223  | 71870124  | TJP2      | + | 133901 | 1.331  | 7903   | 14066  | 1740  | 8.08  | 0   |
| chr17 | 40439564  | 40463960  | STAT5A    | + | 24396  | 0.524  | 566    | 1007   | 125   | 8.006 | 0   |
| chr10 | 47133294  | 47133836  | LOC728643 | - | 542    | 1.891  | 45     | 80     | 10    | 7.841 | 0   |
| chr10 | 70847827  | 70864567  | SRGN      | + | 16740  | 1.765  | 1309   | 2321   | 297   | 7.812 | 0   |
| chr3  | 194406621 | 194409766 | FAM43A    | + | 3145   | 3.143  | 437    | 774    | 101   | 7.662 | 0   |
| chr12 | 26272958  | 26278003  | BHLHE41   | - | 5045   | 1.257  | 280    | 496    | 65    | 7.626 | 3   |
| chr2  | 61108751  | 61150178  | REL       | + | 41427  | 1.986  | 3639   | 6419   | 860   | 7.459 | 0   |
| chr17 | 67240575  | 67323323  | ABCA5     | - | 82748  | 2.455  | 8976   | 15784  | 2168  | 7.28  | 0   |
| chr3  | 11178778  | 11304939  | HRH1      | + | 126161 | 3.074  | 17118  | 29980  | 4256  | 7.043 | 0   |
| chr3  | 100468178 | 100712334 | ABI3BP    | - | 244156 | 0.6    | 6456   | 11281  | 1630  | 6.919 | >5  |
| chr10 | 30722949  | 30750762  | MAP3K8    | + | 27813  | 1.359  | 1666   | 2906   | 426   | 6.815 | 0   |
| chr14 | 77253585  | 77279283  | ANGEL1    | - | 25698  | 0.842  | 953    | 1660   | 245   | 6.756 | 0   |
| chr2  | 159825145 | 160089170 | TANC1     | + | 264025 | 3.675  | 42753  | 74463  | 11043 | 6.743 | 1   |
| chr6  | 37137921  | 37143204  | PIM1      | + | 5283   | 2.487  | 578    | 1007   | 149   | 6.725 | 3   |
| chr1  | 209848669 | 209849735 | GOS2      | + | 1066   | 3.313  | 155    | 269    | 41    | 6.562 | 2   |
| chr19 | 45251977  | 45263301  | BCL3      | + | 11324  | 1.079  | 537    | 931    | 143   | 6.516 | 4   |
| chr11 | 102217965 | 102249401 | BIRC2     | + | 31436  | 10.255 | 14175  | 24521  | 3829  | 6.403 | 0   |
| chr15 | 45927255  | 45983479  | SQRDL     | + | 56224  | 1.43   | 3534   | 6104   | 963   | 6.337 | 1   |
| chr8  | 22298482  | 22398657  | PPP3CC    | + | 100175 | 4.256  | 18735  | 32344  | 5126  | 6.309 | 1   |
| chr10 | 95653729  | 95662491  | SLC35G1   | + | 8762   | 1.758  | 676    | 1165   | 187   | 6.214 | 1   |
| chr12 | 91539034  | 91576806  | DCN       | - | 37772  | 0.699  | 1159   | 1996   | 322   | 6.185 | 5   |
| chr3  | 5021096   | 5026865   | BHLHE40   | + | 5769   | 2.519  | 637    | 1097   | 178   | 6.163 | 3   |
| chr4  | 75230859  | 75254477  | EREG      | + | 23618  | 7.267  | 7530   | 12926  | 2133  | 6.06  | 0   |
| chr3  | 106959538 | 107045811 | LOC344595 | + | 86273  | 0.778  | 2942   | 5048   | 836   | 6.034 | 4   |
| chr18 | 55711609  | 56068772  | NEDD4L    | + | 357163 | 2.641  | 41364  | 70912  | 11816 | 6.001 | 3   |
| chr1  | 117057155 | 117113715 | CD58      | - | 56560  | 1.743  | 4321   | 7394   | 1249  | 5.918 | 0   |
| chr21 | 33784751  | 33887697  | C21orf63  | + | 102946 | 0.999  | 4508   | 7712   | 1303  | 5.918 | 0   |
| chr1  | 120161999 | 120190390 | ZNF697    | - | 28391  | 2.021  | 2514   | 4299   | 728   | 5.9   | 1   |
| chr9  | 117781853 | 117880536 | TNC       | - | 98683  | 2.239  | 9679   | 16544  | 2814  | 5.878 | 2   |
| chr14 | 55034329  | 55260033  | SAMD4A    | + | 225704 | 13.161 | 130113 | 222180 | 38046 | 5.84  | 4   |
| chr8  | 67474409  | 67525480  | MYBL1     | - | 51071  | 6.013  | 13451  | 22968  | 3934  | 5.837 | >5  |

## Supplementary Table I.

Number of TNF-induced BruUV-seq peaks associated with the the top 100 genes induced in HF1 cells following a 1 hr treatment with TNF.

Orange fields: genes associated with >5 TNF-induced BruUV-seq peaks;

Green fields: TNF-induced genes with no TNF-induced BruUV-seq peaks.

## SUPPLEMENTARY MATERIAL

### **BruUV-seq and Bru-seq signals are positively correlated**

Gene length influences the difference between gene expression values measured by Bru-seq and BruUV-seq (Fig. 1b). We reasoned that this bias would be eliminated by using only a short region downstream of the TSS for measuring expression. Indeed, the ratio between Bru-seq and BruUV-seq signal in the first 5 kb of genes was not correlated to the sizes of the genes (Supplementary Fig. 4a). Furthermore, the Bru-seq and BruUV-seq expression measurements within the first 5 kb of the genes were strongly correlated (Supplementary Fig. 4b,  $r=0.939$ ). The BruUV-seq signal in the first 5 kb after the TSS was also correlated with Bru-seq expression along the whole length of the genes, albeit more weakly (Supplementary Fig. 5c,  $r=0.875$ ). This difference was more pronounced for genes expressing two or more TSS (Supplementary Fig. 5d,  $r=0.739$ ). The positive correlation between the two techniques suggests that BruUV-seq data are predictive of Bru-seq data and therefore BruUV-seq could be used as a surrogate for nascent RNA transcription measurements with Bru-seq.

Using a restricted portion of a gene to calculate its expression value, however, is counterintuitive since one generally wants to use all available data. To determine if restricting the expression measurement was reasonable, we compared the amount of variation observed in both approaches. We randomly selected a given number of reads 10 times from both Bru-seq and BruUV-seq samples to simulate a given read depth. The median coefficient of variation in gene expression from Bru-seq and BruUV-seq were very similar, but consistently lower in Bru-seq, regardless of the simulated read

depth assessed. Interestingly, higher doses of UV (100 J/m<sup>2</sup>) lead to smaller overall coefficients of variation when compared to lower doses of UV (25 J/m<sup>2</sup>) (Supplementary Fig. 6). This is likely caused by the greater accumulation of mapped reads within the first 5 kb downstream of the TSS at higher UV doses (Fig. 1e&f) and suggests that BruUV-seq performs better at higher doses of UV.
